# Supplementary material for: The pharmacogenomics of carbamazepine-induced cutaneous adverse drug reaction in the South of Vietnam
Source: Front Pharmacol. 2023 Jul 13;14:1217516. doi: 10.3389/fphar.2023.1217516 (PMC10374328; doi:10.3389/fphar.2023.1217516)
Supplement: Supplementary file 1 [file Table1.XLSX]

## Sheet: Sheet1
	Table S1: The sreening process of evaluated studies
	id	Title	DOI	Link	Database	Sub_id	Pre-screen	Abstract_screen	Full-text_screen	Result	Final Inclusion/Exclusion
	1	HLA-B*15:21 and carbamazepine-induced Stevens-Johnson syndrome: pooled-data and in silico analysis	10.1038/srep45553	https://pubmed.ncbi.nlm.nih.gov/28358139/	Pubmed	1	Case-report	Case-report	Case-report	Case-report	Excluded
	2	Pharmacogenetic screening of carbamazepine-induced severe cutaneous allergic reactions	10.1016/j.jocn.2010.12.054	https://pubmed.ncbi.nlm.nih.gov/21802305/	Pubmed	2	Included	Review	Review	Review	Excluded
	3	Association between the HLA-B alleles and carbamazepine-induced SJS/TEN: A meta-analysis	10.1016/j.eplepsyres.2017.05.015	https://pubmed.ncbi.nlm.nih.gov/28618376/	Pubmed	3	Included	Meta-analysis	Meta-analysis	Meta-analysis	Excluded
	4	Genetic susceptibilities and prediction modeling of carbamazepine and allopurinol-induced severe cutaneous adverse reactions in Vietnamese	10.2217/pgs-2019-0146	https://pubmed.ncbi.nlm.nih.gov/33356553/	Pubmed	4	Included	Included	Included	Included	Included
	5	HLA-B*1502 and carbamazepine-induced severe cutaneous adverse drug reactions in Vietnamese	10.5415/apallergy.2015.5.2.68	https://pubmed.ncbi.nlm.nih.gov/25938071/	Pubmed	5	Included	Included	Included	Included	Included
	6	Pharmacogenetics of cutaneous adverse drug reactions	10.1111/j.1346-8138.2010.01196.x	https://pubmed.ncbi.nlm.nih.gov/21342226/	Pubmed	6	Included	Review	Review	Review	Excluded
	7	Carbamazepine-induced toxic effects and HLA-B*1502 screening in Taiwan	10.1056/NEJMoa1009717	https://pubmed.ncbi.nlm.nih.gov/21428768/	Pubmed	7	Included	Included	Not Vietnamese	Not Vietnamese	Excluded
	8	Pharmacogenetic screening of carbamazepine-induced severe cutaneous allergic reactions	10.1016/j.jocn.2010.12.054	https://pubmed.ncbi.nlm.nih.gov/21802305/	Pubmed	8	Included	Review	Review	Review	Excluded
	9	HLA-B alleles associated with severe cutaneous reactions to antiepileptic drugs in Han Chinese	10.1111/epi.12217	https://pubmed.ncbi.nlm.nih.gov/23692434/	Pubmed	9	Included	Included	Not Vietnamese	Not Vietnamese	Excluded
	10	Drug-induced Stevens-Johnson syndrome and toxic epidermal necrolysis in vietnamese spontaneous adverse drug reaction database: A subgroup approach to disproportionality analysis	10.1111/jcpt.12754	https://pubmed.ncbi.nlm.nih.gov/30129156/	Pubmed	10	Included	Included	Not relevant	Not relevant	Excluded
	11	Common risk allele in aromatic antiepileptic-drug induced Stevens-Johnson syndrome and toxic epidermal necrolysis in Han Chinese	10.2217/pgs.09.162	https://pubmed.ncbi.nlm.nih.gov/20235791/	Pubmed	11	Included	Included	Not Vietnamese	Not Vietnamese	Excluded
	12	Association between HLA and Stevens-Johnson syndrome induced by carbamazepine in Southern Han Chinese: genetic markers besides B*1502?	10.1111/j.1742-7843.2012.00868.x	https://pubmed.ncbi.nlm.nih.gov/22348435/	Pubmed	12	Included	Included	Not Vietnamese	Not Vietnamese	Excluded
	13	HLA-B*57:01 confers genetic susceptibility to carbamazepine-induced SJS/TEN in Europeans	https://doi.org/10.1111/all.13821	https://onlinelibrary.wiley.com/doi/full/10.1111/all.13821?casa_token=wDbwjYGkkNMAAAAA%3AELKrMbIHoM6ampw8nspwYskrw3Fezw3ueGx0v2uK3JLE1ulLg1pC88lMpXO4UoAgt_vf1cqwH_oY75eA	Google scholar	1	Included	Included	Not Vietnamese	Not Vietnamese	Excluded
	14	The Link between HLA-B Alleles and Causative Drugs in Vietnamese Patients with Stevens-Johnson Syndrome/Toxic Epidermal Necrolysis	https://doi.org/10.3889/oamjms.2020.4906	https://oamjms.eu/index.php/mjms/article/view/4906	Google scholar	2	Included	Included	Included	Included	Included
	15	The association of HLA B*15:02 allele and Stevens–Johnson syndrome/toxic epidermal necrolysis induced by aromatic anticonvulsant drugs in a South Indian population	ttps://doi.org/10.1111/ijd.13812	https://onlinelibrary.wiley.com/doi/full/10.1111/ijd.13812?casa_token=8BPt7H8OqRYAAAAA%3AcwrokyjRfhNQNEi4Wt-TjYVL_QuabrX2QdHqOtCaT623aC7p2nJZxAqZtnwpCIUwNHitOvhYJ1jOxQAG	Google scholar	3	Included	Included	Not Vietnamese	Not Vietnamese	Excluded
	16	Genetic susceptibilities and prediction modeling of carbamazepine and allopurinol-induced severe cutaneous adverse reactions in Vietnamese	https://doi.org/10.2217/pgs-2019-0146	https://www.futuremedicine.com/doi/abs/10.2217/pgs-2019-0146	Google scholar	4	Duplication	Duplication	Duplication	Duplication	Excluded
	17	01 and HLA-B*15:02 association with Stevens–Johnson syndrome and toxic epidermal necrolysis to carbamazepine in a multiethnic Malaysian population	10.1097/FPC.0000000000000287	https://journals.lww.com/jpharmacogenetics/Fulltext/2017/07000/HLA_A_31__01_and_HLA_B_15_02_association_with.5.aspx?casa_token=Bu3_vbb8HU0AAAAA:KlmCVW9K5cIRjO5aLpW9zTc4IiPYjWHtnEbPnW44ttEjvN0UvUeR7KaVj5ZP0vf-QaiH2rOOwYnvSVB4Z9LxtAQW	Google scholar	5	Included	Included	Not Vietnamese	Not Vietnamese	Excluded
	18	The HLA-B*15:02 polymorphism and Tegretol®-induced serious cutaneous reactions in epilepsy: An updated systematic review and meta-analysis	https://doi.org/10.1016/j.neurol.2017.11.006	https://www.sciencedirect.com/science/article/pii/S0035378716303393?casa_token=c-alB8698_YAAAAA:BGR1E5M2InmIjJuCpGko0jiyDJdsjr0R3dNvLMzUzFWHcIKGs50IpJLy-g4TjY9fFJ_OYw4agS4	Google scholar	6	Included	Meta-analysis	Meta-analysis	Meta-analysis	Excluded
	19	HLA-B*15:21 and carbamazepine-induced Stevens-Johnson syndrome: pooled-data and in silico analysis	https://doi.org/10.1038/srep45553	https://www.nature.com/articles/srep45553	Google scholar	7	Duplication	Duplication	Duplication	Duplication	Excluded
	20	Genetic Susceptibility to Carbamazepine and Allopurinol–Induced Severe Cutaneous Adverse Reactions in Vietnamese	https://doi.org/10.1016/j.jaci.2016.12.378	https://www.nature.com/articles/srep45553	Google scholar	8	Included	Included	Included	Included	Included
	21	Association between the HLA-B alleles and carbamazepine-induced SJS/TEN: A meta-analysis	https://doi.org/10.1016/j.eplepsyres.2017.05.015	https://www.sciencedirect.com/science/article/pii/S0920121116303114?casa_token=wysOrtm34DsAAAAA:dGs2RzhOsyu1qoMmg68SvmfSjyAC8o9b-DDLw538JBQidGZrmHD6f5YzpIjf_2y423nQ4qPZ0Cc	Google scholar	9	Included	Meta-analysis	Meta-analysis	Meta-analysis	Excluded
	22	Validation of a novel real-time PCR assay for detection of HLA-B*15:02 allele for prevention of carbamazepine – Induced Stevens-Johnson syndrome/Toxic Epidermal Necrolysis in individuals of Asian ancestry	https://doi.org/10.1016/j.humimm.2016.08.010	https://www.sciencedirect.com/science/article/pii/S0920121116303114?casa_token=wysOrtm34DsAAAAA:dGs2RzhOsyu1qoMmg68SvmfSjyAC8o9b-DDLw538JBQidGZrmHD6f5YzpIjf_2y423nQ4qPZ0Cc	Google scholar	10	Included	Genotyping method	Genotyping method	Genotyping method	Excluded
	23	Association of carbamazepine-induced Stevens–Johnson syndrome/toxic epidermal necrolysis with the HLA-B75 serotype or HLA-B*15:21 allele in Filipino patients	https://doi.org/10.1038/s41397-019-0143-8	https://www.nature.com/articles/s41397-019-0143-8	Google scholar	11	Included	Included	Not Vietnamese	Not Vietnamese	Excluded
	24	Next-generation sequencing-based HLA typing reveals the association of HLA-B*46:01:01 and HLA-DRB1*09:01:02 alleles with carbamazepine-induced hypersensitivity reactions in Vietnamese patients with epilepsy	https://doi.org/10.1016/j.humimm.2023.01.005	https://www.sciencedirect.com/science/article/pii/S0198885923000058?casa_token=v_L8SvP1G3kAAAAA:VNc4jIfEWB-bAaEjVNSxDOMLbvR3bjMrXB4bKZ6mocKbn8XytC9jQGN7pUrAMggKd2xRNNMoPts	Google scholar	12	Included	Included	Included	Included	Included
	25	Development of label-free electrochemical impedance spectroscopy for the detection of HLA-B*15:02 and HLA-B*15:21 for the prevention of carbamazepine-induced Stevens-Johnson syndrome	https://doi.org/10.1016/j.ab.2022.114931	https://www.sciencedirect.com/science/article/pii/S0003269722003918?casa_token=8AiDDh_apjsAAAAA:E9bVpa04JZrQkuqqWjtmez07SYuPFwK1oDePdZQvAVRC_M0iIaIiCRAtZWPjYf6TZWb2jTSgwvQ	Google scholar	13	Included	Genotyping method	Genotyping method	Genotyping method	Excluded
	26	The utility of surrogate markers in predicting HLA alleles associated with adverse drug reactions in Vietnamese	10.12932/AP-170219-0493	https://apjai-journal.org/wp-content/uploads/2022/05/8_AP-170219-0493.pdf	Google scholar	14	Included	Genotyping method	Genotyping method	Genotyping method	Excluded
	27	A novel multiplex polymerase chain reaction assay for detection of both HLA-A*31:01/HLA-B*15:02 alleles, which confer susceptibility to carbamazepine-induced severe cutaneous adverse reactions	https://doi.org/10.1111/tan.13143	https://onlinelibrary.wiley.com/doi/full/10.1111/tan.13143?casa_token=BwyGOZDEmGoAAAAA%3A78xzv1YdWxzrUSBoi1pg8psn_oRvkemefOmwHL_MeuA2l1TmcFrf9qr6IildAIVFMlMHNSMsQERf1p5u	Google scholar	15	Included	Genotyping method	Genotyping method	Genotyping method	Excluded
	28	Spectrum of cutaneous adverse reactions to aromatic antiepileptic drugs and human leukocyte antigen genotypes in Thai patients and meta-analysis	https://doi.org/10.1038/s41397-021-00247-3	https://www.nature.com/articles/s41397-021-00247-3	Google scholar	16	Included	Meta-analysis	Meta-analysis	Meta-analysis	Excluded
	29	Dapsone-induced severe cutaneous adverse drug reactions are strongly linked with HLA-B*13 01 allele in the Thai population	27(12):p 429-437, December 2017.	https://journals.lww.com/jpharmacogenetics/fulltext/2017/12000/dapsone_induced_severe_cutaneous_adverse_drug.1.aspx?casa_token=psJSbI2XlUYAAAAA:nBD9FE3N8KN0uAXyI2LhPzcsKmGOC_Iov3Ch9ZOuclz95vdJWIEqh1ntDwUMa7hogQ7SAmn1p8jBH4M7Ky5WX4Hz	Google scholar	17	Included	Included	Not carbamazepine	Not carbamazepine	Excluded
	30	Diagnostic Utility of Human Leukocyte Antigen B*15:02 Screening in Severe Carbamazepine Hypersensitivity Syndrome	10.4103/aian.AIAN_492_18	https://www.ncbi.nlm.nih.gov/pmc/articles/PMC6839291/	Google scholar	18	Included	Included	Not Vietnamese	Not Vietnamese	Excluded
	31	rs144012689 is a highly specific representative marker of HLA-B*15:02 in the Chinese population	https://doi.org/10.2217/pgs-2022-0075	https://www.futuremedicine.com/doi/full/10.2217/pgs-2022-0075	Google scholar	19	Included	Included	Not Vietnamese	Not Vietnamese	Excluded
	32	A Draft Genome of Euroglyphus Maynei with Predicted Allergens	https://doi.org/10.1016/j.jaci.2016.12.380	https://www.futuremedicine.com/doi/full/10.2217/pgs-2022-0075	Google scholar	20	Included	Included	Not relevant	Not relevant	Excluded
	33	Phenytoin Therapy and HLA-B*15:02 and CYP2C9 Genotype	PMID: 28520374	https://europepmc.org/article/NBK/nbk385287	Google scholar	21	Included	Included	Not carbamazepine	Not carbamazepine	Excluded
	34	Species- and Sequence-Specific Quantification of House Dust Mite Allergens By Multiple Reaction Monitoring (MRM) Mass Spectrometry (MS)	https://doi.org/10.1016/j.jaci.2016.12.379	https://www.jacionline.org/article/S0091-6749(16)31897-8/fulltext	Google scholar	22	Included	Included	Not relevant	Not relevant	Excluded
	35	Predominant HLA Alleles and Haplotypes in Mild Adverse Drug Reactions Caused by Allopurinol in Vietnamese Patients with Gout	https://doi.org/10.3390/diagnostics11091611	https://www.mdpi.com/2075-4418/11/9/1611	Google scholar	23	Included	Included	Not carbamazepine	Not carbamazepine	Excluded
	36	Comparison of a New In-House and Three Published HLA-B*15:02 Screening Methods for Prevention of Carbamazepine-Induced Severe Drug Reactions	https://doi.org/10.1371/journal.pone.0155907	https://journals.plos.org/plosone/article?id=10.1371/journal.pone.0155907	Google scholar	24	Included	Genotyping method	Genotyping method	Genotyping method	Excluded
	37	Rapid and reliable screening of HLA-B*15:02 in four Chinese populations using single-tube multiplex real-time PCR assay	https://doi.org/10.2217/pgs-2017-0041	https://www.futuremedicine.com/doi/full/10.2217/pgs-2017-0041	Google scholar	25	Included	Genotyping method	Genotyping method	Genotyping method	Excluded
	38	Developing pharmacogenetic screening methods for an emergent country: Vietnam	https://doi.org/10.1016/j.waojou.2019.100037	https://www.sciencedirect.com/science/article/pii/S1939455119306660	Google scholar	26	Included	Systematic review	Systematic review	Systematic review	Excluded
	39	Genetic variants associated with severe cutaneous adverse drug reactions induced by carbamazepine	https://doi.org/10.1111/bcp.15022	https://bpspubs.onlinelibrary.wiley.com/doi/full/10.1111/bcp.15022	Google scholar	27	Included	Included	Not Vietnamese	Not Vietnamese	Excluded
	40	Association of HLA-B38:02 with Antithyroid Drug-Induced Agranulocytosis in Kinh Vietnamese Patients	https://doi.org/10.1155/2018/7965346	https://www.hindawi.com/journals/ije/2018/7965346/	Google scholar	28	Included	Included	Not carbamazepine	Not carbamazepine	Excluded
	41	Drug-induced severe cutaneous adverse reactions: Determine the cause and prevention	https://doi.org/10.1016/j.anai.2019.08.004	https://www.sciencedirect.com/science/article/abs/pii/S1081120619305800	Google scholar	29	Included	Systematic review	Systematic review	Systematic review	Excluded
	42	Predominant HLA Alleles and Haplotypes in Mild Adverse Drug Reactions Caused by Allopurinol in Vietnamese Patients with Gout	doi.org/10.3390/diagnostics11091611	https://d1wqtxts1xzle7.cloudfront.net/84008994/diagnostics-11-01611-libre.pdf?1649809932=&response-content-disposition=inline%3B+filename%3DPredominant_HLA_Alleles_and_Haplotypes_i.pdf&Expires=1686753879&Signature=DBhG3YxOgWO0sDGSAmNAi-8acPiGCfnJFWWCEMr927piRXzaixJTbmAxpRqiuTZeWsv6JnnQ3BHsU0Dg8yL2~NRtWpCZ0PjjGsqmK-Q2gWRsGZaQJAPZ4QwC1wyIQQm0ZrvhS~Zlu8pHT6sHwMWSYFsICQE0zU~1PRAqdqQK32Ei-nnukLoxUYKKv…	Google scholar	30	Duplication	Duplication	Duplication	Duplication	Excluded
	43	Genetic Diversity of HLA Class I and Class II Alleles in Thai Populations: Contribution to Genotype-Guided Therapeutics	https://doi.org/10.3389/fphar.2020.00078	https://www.frontiersin.org/articles/10.3389/fphar.2020.00078/full	Google scholar	31	Included	Included	Not Vietnamese	Not Vietnamese	Excluded
	44	Spectrum of cutaneous adverse reactions to aromatic antiepileptic drugs and human leukocyte antigen genotypes in Thai patients and meta-analysis	https://doi.org/10.1038/s41397-021-00247-3	https://www.nature.com/articles/s41397-021-00247-3	Google scholar	32	Duplication	Duplication	Duplication	Duplication	Excluded
	45	Association between HLA gene polymorphism and cutaneous adverse reactions caused by antiepileptic drugs	https://doi.org/10.3892/etm.2018.5801	https://www.spandidos-publications.com/10.3892/etm.2018.5801?text=abstract	Google scholar	33	Included	Included	Not Vietnamese	Not Vietnamese	Excluded
	46	Gene expression profiling in allopurinol-induced severe cutaneous adverse reactions in Vietnamese	https://doi.org/10.2217/pgs-2020-0014	https://www.futuremedicine.com/doi/abs/10.2217/pgs-2020-0014	Google scholar	34	Included	Included	Not carbamazepine	Not carbamazepine	Excluded
	47	HLA-B locus in Japanese patients with anti-epileptics and allopurinol-related Stevens–Johnson syndrome and toxic epidermal necrolysis	https://doi.org/10.2217/14622416.9.11.1617	https://www.futuremedicine.com/doi/abs/10.2217/14622416.9.11.1617	Google scholar	35	Included	Included	Not Vietnamese	Not Vietnamese	Excluded
	48	Pharmacogenetic Testing for Prevention of Severe Cutaneous Adverse Drug Reactions	https://doi.org/10.3389/fphar.2020.00969	https://www.frontiersin.org/articles/10.3389/fphar.2020.00969/full	Google scholar	36	Included	Systematic review	Systematic review	Systematic review	Excluded
	49	HLA-B*39:01:01 is a novel risk factor for antithyroid drug-induced agranulocytosis in Japanese population	https://doi.org/10.1038/s41397-020-00187-4	https://www.nature.com/articles/s41397-020-00187-4#citeas	Google scholar	37	Included	Included	Not Vietnamese	Not Vietnamese	Excluded
	50	Stevens-Johnson Syndrome following Failure of Genetic Screening prior to Carbamazepine Prescription	https://doi.org/10.1155/2017/4201357	https://www.hindawi.com/journals/crid/2017/4201357/	Google scholar	38	Included	Included	Not Vietnamese	Not Vietnamese	Excluded
	51	Human Leukocyte Antigen Gene Testing and Carbamazepine-Induced Toxic Epidermal Necrolysis: A Study of Pediatric Practice	10.1177/1203475420952422	https://journals.sagepub.com/doi/pdf/10.1177/1203475420952422	Google scholar	39	Case-report	Case-report	Case-report	Case-report	Excluded
	52	Pharmacogenomics in Asian Subpopulations and Impacts on Commonly Prescribed Medications	https://doi.org/10.1111/cts.12771	https://ascpt.onlinelibrary.wiley.com/doi/full/10.1111/cts.12771	Google scholar	40	Included	Systematic review	Systematic review	Systematic review	Excluded
	53	An update on HLA alleles associated with adverse drug reactions	doi.org/10.1515/dmpt-2016-0025	https://www.degruyter.com/document/doi/10.1515/dmpt-2016-0025/html	Google scholar	41	Included	Systematic review	Systematic review	Systematic review	Excluded
	54	Accuracy of SNPs to predict risk of HLA alleles associated with drug-induced hypersensitivity events across racial groups	https://doi.org/10.2217/pgs.15.41	https://www.futuremedicine.com/doi/abs/10.2217/pgs.15.41	Google scholar	42	Included	Systematic review	Systematic review	Systematic review	Excluded
	55	HLA-B*58:01 allele is associated with augmented risk for both mild and severe cutaneous adverse reactions induced by allopurinol in Han Chinese	https://doi.org/10.2217/pgs.12.89	https://www.futuremedicine.com/doi/abs/10.2217/pgs.12.89	Google scholar	43	Included	Included	Not Vietnamese	Not Vietnamese	Excluded
	56	HLA-B locus in Caucasian patients with carbamazepine hypersensitivity	https://doi.org/10.2217/14622416.7.6.813	https://www.futuremedicine.com/doi/abs/10.2217/14622416.7.6.813	Google scholar	44	Included	Included	Not Vietnamese	Not Vietnamese	Excluded
	57	HLA-associated antiepileptic drug-induced cutaneous adverse reactions	https://doi.org/10.1111/tan.13530	https://onlinelibrary.wiley.com/doi/full/10.1111/tan.13530?casa_token=MsFZIWJsmjkAAAAA%3AUUpsJ4aH52TGB9ZwZTfGToTAfxUSZpTreeR-U7XzuiNlHF_zjO23pOQ1qFHOFAtFo1xh7SmnjKkJ_NUP	Google scholar	45	Included	Systematic review	Systematic review	Systematic review	Excluded
	58	An effective strategy to prevent allopurinol-induced hypersensitivity by HLA typing	https://doi.org/10.1038/gim.2014.195	https://www.nature.com/articles/gim2014195	Google scholar	46	Included	Included	Not carbamazepine	Not carbamazepine	Excluded
	59	HLA-A*24:07 as a potential biomarker for carbamazepine-induced Stevens–Johnson syndrome/toxic epidermal necrolysis in Filipino patients	https://doi.org/10.2217/pgs-2020-0191	https://www.futuremedicine.com/doi/abs/10.2217/pgs-2020-0191	Google scholar	47	Included	Included	Not Vietnamese	Not Vietnamese	Excluded
	60	Evolution of HLA-B Pharmacogenomics and the Importance of PGx Data Integration in Health Care System: A 10 Years Retrospective Study in Thailand	10.3389/fphar.2022.866903	https://www.ncbi.nlm.nih.gov/pmc/articles/PMC9016335/	Google scholar	48	Included	Included	Not Vietnamese	Not Vietnamese	Excluded
	61	An update on CYP2C9 polymorphisms and phenytoin metabolism: implications for adverse effects	https://doi.org/10.1080/17425255.2020.1780209	https://www.tandfonline.com/doi/abs/10.1080/17425255.2020.1780209	Google scholar	49	Included	Included	Not carbamazepine	Not carbamazepine	Excluded
	62	Lamotrigine and Stevens-Johnson Syndrome Prevention	PMC8146560	https://www.ncbi.nlm.nih.gov/pmc/articles/PMC8146560/	Google scholar	50	Included	Included	Not carbamazepine	Not carbamazepine	Excluded
	63	HLA and Delayed Drug-Induced Hypersensitivity	https://doi.org/10.1159/000448217	https://karger.com/iaa/article-abstract/170/3/163/167845/HLA-and-Delayed-Drug-Induced-Hypersensitivity?redirectedFrom=fulltext	Google scholar	51	Included	Systematic review	Systematic review	Systematic review	Excluded
	64	Carbamazepine, HLA-B*1502 and risk of Stevens–Johnson syndrome and toxic epidermal necrolysis: US FDA recommendations	https://doi.org/10.2217/14622416.9.10.1543	https://www.futuremedicine.com/doi/abs/10.2217/14622416.9.10.1543	Google scholar	52	Included	Included	Not Vietnamese	Not Vietnamese	Excluded
	65	An update on HLA alleles as pharmacogenetic markers for antiepileptic drug-induced cutaneous adverse reaction	https://doi.org/10.31117/neuroscirn.v2i2.29	https://neuroscirn.org/ojs/index.php/nrnotes/article/view/29	Google scholar	53	Included	Systematic review	Systematic review	Systematic review	Excluded
	66	Role of human leukocyte antigen in anti-epileptic drugs-induced Stevens–Johnson Syndrome/toxic epidermal necrolysis: A meta-analysis	https://doi.org/10.1016/j.seizure.2022.09.011	https://www.sciencedirect.com/science/article/pii/S1059131122002035?casa_token=TcMhooyhBb8AAAAA:pDp8peXhW4kJL_vBuj5cufju0LLzTgD1ORY3xZqZOeEtsthWqMkJjxgS-WA04m7_1rXi-MjqBHg	Google scholar	54	Included	Meta-analysis	Meta-analysis	Meta-analysis	Excluded
	67	HLA alleles and haplotypes in Burmese (Myanmarese) and Karen in Thailand	https://doi.org/10.1111/tan.12637	https://onlinelibrary.wiley.com/doi/full/10.1111/tan.12637?casa_token=VjVYBnC01qMAAAAA%3A67TqYCppfY2d_QWTvzeFyvfnH6jW5woozmvq7pMNUuBOpvAKkCa3tih1kAYwR9YFUgwhGS3KSBbj39nu	Google scholar	55	Included	Included	Not Vietnamese	Not Vietnamese	Excluded
	68	HLA Pharmacogenetic Markers of Drug Hypersensitivity in a Thai Population	https://doi.org/10.3389/fgene.2018.00277	https://www.frontiersin.org/articles/10.3389/fgene.2018.00277/full	Google scholar	56	Included	Included	Not Vietnamese	Not Vietnamese	Excluded
	69	Ongoing Initiatives in Bringing the Preemptive Panel—Based Pharmacogenetic Testing to Clinical Decisions in Vietnam	https://doi.org/10.1007/978-3-030-75506-5_47	https://link.springer.com/chapter/10.1007/978-3-030-75506-5_47	Google scholar	57	Included	Genotyping method	Genotyping method	Genotyping method	Excluded
	70	Carbamazepine-induced Stevens-Johnson syndrome/toxic epidermal necrolysis overlap in a Filipino with positive HLA-B75 serotype	http://dx.doi.org/10.1136/bcr-2018-225028	https://casereports.bmj.com/content/2018/bcr-2018-225028.short?casa_token=ihpEJWUKdccAAAAA:Xtp7UmV6DG-U3ZuxXzCzyBpHR2P6n9TEQcIHF2Ac3xPuS8h7CIwLJ67JL2LMZ5U1RbJpDO8U98y7	Google scholar	58	Included	Included	Not Vietnamese	Not Vietnamese	Excluded
	71	Carbamazepine-induced Stevens-Johnson syndrome/toxic epidermal necrolysis overlap in a Filipino with positive HLA-B75 serotype	http://dx.doi.org/10.1136/bcr-2018-225028	https://casereports.bmj.com/content/2018/bcr-2018-225028.short?casa_token=ihpEJWUKdccAAAAA:Xtp7UmV6DG-U3ZuxXzCzyBpHR2P6n9TEQcIHF2Ac3xPuS8h7CIwLJ67JL2LMZ5U1RbJpDO8U98y7	Google scholar	59	Duplication	Duplication	Duplication	Duplication	Excluded
	72	Carbamazepine-induced Stevens-Johnson syndrome/toxic epidermal necrolysis overlap in a Filipino with positive HLA-B75 serotype	10.1136/bcr-2018-225028	https://www.ncbi.nlm.nih.gov/pmc/articles/PMC6058113/	Google scholar	60	Duplication	Duplication	Duplication	Duplication	Excluded
	73	Delayed-type hypersensitivity to oral and parenteral drugs	https://doi.org/10.1111/ddg.13362	https://onlinelibrary.wiley.com/doi/full/10.1111/ddg.13362?casa_token=O1OY8rrbNK8AAAAA%3A0tW3DD3D-ukJ1aBhOgp2G-v0UVPFU7CUgGeY4tFxhtqUu9_4IsRi68n3DarpQbxjMkQR5-ndFk3OKvGl	Google scholar	61	Included	CME article	CME article	CME article	Excluded
	74	The Profiles of Stevens-Johnson Syndrome (SJS) and Toxic Epidermal Necrolysis (TEN) Patients in Tertiary Hospital	-	https://pdfs.semanticscholar.org/a567/3565f77c94204f110633ff4f6adc07b7f2ff.pdf	Google scholar	62	Included	Included	Not Vietnamese	Not Vietnamese	Excluded
	75	Pharmacogenomics of Drug Hypersensitivity	https://doi.org/10.1016/j.iac.2022.01.006	https://www.immunology.theclinics.com/article/S0889-8561(22)00006-6/fulltext	Google scholar	63	Included	Systematic review	Systematic review	Systematic review	Excluded
	76	Stevens-Johnson syndrome and toxic epidermal necrolysis: risk factors, causality assessment and potential prevention strategies	https://doi.org/10.1080/1744666X.2020.1740591	https://www.tandfonline.com/doi/abs/10.1080/1744666X.2020.1740591	Google scholar	64	Included	Systematic review	Systematic review	Systematic review	Excluded
	77	Population pharmacogenomics: an update on ethnogeographic differences and opportunities for precision public health	https://doi.org/10.1007/s00439-021-02385-x	https://link.springer.com/article/10.1007/s00439-021-02385-x	Google scholar	65	Included	Systematic review	Systematic review	Systematic review	Excluded
	78	Diagnostic Test Criteria for HLA Genotyping to Prevent Drug Hypersensitivity Reactions: A Systematic Review of Actionable HLA Recommendations in CPIC and DPWG Guidelines	https://doi.org/10.3389/fphar.2020.567048	https://www.frontiersin.org/articles/10.3389/fphar.2020.567048/full	Google scholar	66	Included	Genotyping method	Genotyping method	Genotyping method	Excluded
	79	Carbamazepine-induced Severe Cutaneous Adverse Drug Reactions: A 21-year comparison between children and adults in Malaysia.	https://doi.org/10.1002/jcph.2289	https://accp1.onlinelibrary.wiley.com/doi/abs/10.1002/jcph.2289?casa_token=dAvR9qPeyPIAAAAA:zfSkbUKtwMmj8BAwIOGLIQYDvz_HXrJq-K5th7Oj23SLaumY6QlLhK45qfNu7H4KS8MkGwC6PQavyEs6	Google scholar	67	Included	Included	Not Vietnamese	Not Vietnamese	Excluded
	80	Genotyping HLA alleles to predict the development of Severe cutaneous adverse drug reactions (SCARs): state-of-the-art	https://doi.org/10.1080/17425255.2021.1946514	https://www.tandfonline.com/doi/full/10.1080/17425255.2021.1946514	Google scholar	68	Included	Review	Review	Review	Excluded
	81	Updates on the immunopathology and genomics of severe cutaneous adverse drug reactions	https://doi.org/10.1016/j.jaci.2022.12.005	https://www.sciencedirect.com/science/article/pii/S0091674922016591?casa_token=OwudJi0oC6kAAAAA:6dhOxac3YkvS0uXgD0XWTnxgatQMaZgzqLLR9_cLTnUkgH1dP7FLFjiWtanjvvJQYZno_ydAzIo	Google scholar	69	Included	Review	Review	Review	Excluded
	82	HLA-associated drug hypersensitivity and the prediction of adverse drug reactions	https://doi.org/10.2217/pgs-2017-0090	https://www.futuremedicine.com/doi/abs/10.2217/pgs-2017-0090	Google scholar	70	Included	Review	Review	Review	Excluded
	83	HLA-A*31:01 and carbamazepine-induced DRESS syndrom in a sample of North African population	https://doi.org/10.1016/j.seizure.2017.10.018	https://www.sciencedirect.com/science/article/pii/S105913111730448X	Google scholar	71	Included	Included	Not Vietnamese	Not Vietnamese	Excluded
	84	Drug-Induced Severe Cutaneous Adverse Reactions: Insights Into Clinical Presentation, Immunopathogenesis, Diagnostic Methods, Treatment, and Pharmacogenomics	10.3389/fphar.2022.832048	https://www.ncbi.nlm.nih.gov/pmc/articles/PMC9065683/	Google scholar	72	Included	Review	Review	Review	Excluded
	85	Genetic variants associated with T cell–mediated cutaneous adverse drug reactions: A PRISMA-compliant systematic review—An EAACI position paper	https://doi.org/10.1111/all.14174	https://onlinelibrary.wiley.com/doi/full/10.1111/all.14174?casa_token=s-lEV9P-BZcAAAAA%3ATysJgYuoLM8BR35ik-ipRffJ9QkrVbFrkryf_dgHUdF_hEr2mmPQA4umUuooVcOFWYzS5rRWuaFz9gDr	Google scholar	73	Included	Review	Review	Review	Excluded
	86	Translational Pharmacogenomics: Discovery, Evidence Synthesis and Delivery of Race-Conscious Medicine	https://doi.org/10.1002/cpt.2357	https://ascpt.onlinelibrary.wiley.com/doi/full/10.1002/cpt.2357?casa_token=lEavNoLIzfMAAAAA%3A9sz61xRaSg_Qs1BajPPcwkb9oCiuBP5iTIOyOrpIS6kBp-eHH5WHPCY9cD3usg60IVd_7Y6guTjMcthU	Google scholar	74	Included	Review	Review	Review	Excluded
	87	Review and Consensus on Pharmacogenomic Testing in Psychiatry	10.1055/a-1288-1061	https://www.thieme-connect.com/products/ejournals/html/10.1055/a-1288-1061	Google scholar	75	Included	Review	Review	Review	Excluded
	88	Association Between HLA genotypes and Oxcarbazepine-induced Cutaneous Adverse Drug Reactions: A Systematic Review and Meta-Analysis	https://doi.org/10.18433/J36S7D	https://journals.library.ualberta.ca/jpps/index.php/JPPS/article/view/29530	Google scholar	76	Included	Systematic review	Systematic review	Systematic review	Excluded
	89	HLA pharmacogenetic markers of drug hypersensitivity from the perspective of the populations of the Greater Middle East	https://doi.org/10.2217/pgs-2022-0078	https://www.futuremedicine.com/doi/full/10.2217/pgs-2022-0078	Google scholar	77	Included	Included	Not Vietnamese	Not Vietnamese	Excluded
	90	Carbamazepine-Induced Incomplete Stevens-Johnson Syndrome: Report of a Case in Children without Mycoplasma pneumoniae Infection	-	https://www.researchgate.net/profile/Leelawadee-Techasatian/publication/296699005_Carbamazepine-Induced_Incomplete_Stevens-Johnson_Syndrome_Report_of_a_Case_in_Children_without_Mycoplasma_pneumoniae_Infection/links/5801c05708ae6c2449f2c5b1/Carbamazepine-Induced-Incomplete-Stevens-Johnson-Syndrome-Report-of-a-Case-in-Children-without-Mycoplasma-pneumoniae-Infection.pdf	Google scholar	78	Case-report	Case-report	Case-report	Case-report	Excluded
	91	Pharmacogenomics for personalized pain medicine	https://doi.org/10.1016/j.aat.2016.02.001	https://www.sciencedirect.com/science/article/pii/S1875459715300278	Google scholar	79	Included	Review	Review	Review	Excluded
	92	Pharmacogenomics as a Tool for Management of Drug Hypersensitivity Reactions	https://doi.org/10.1007/s40521-019-0199-3	https://link.springer.com/article/10.1007/s40521-019-0199-3	Google scholar	80	Included	Included	Not relevant	Not relevant	Excluded
	93	Genetic Determinants in HLA and Cytochrome P450 Genes in the Risk of Aromatic Antiepileptic-Induced Severe Cutaneous Adverse Reactions	https://doi.org/10.3390/jpm11050383	https://www.mdpi.com/2075-4426/11/5/383	Google scholar	81	Included	Review	Review	Review	Excluded
	94	Characterization of Drug-Specific CD4+ T-Cells Reveals Possible Roles of HLA Class II in the Pathogenesis of Carbamazepine Hypersensitivity Reactions	https://pubs.acs.org/doi/10.1021/acs.chemrestox.2c00414.	https://pubs.acs.org/doi/full/10.1021/acs.chemrestox.2c00414	Google scholar	82	Included	Review	Review	Review	Excluded
	95	Distribution of HLA-B Alleles and Haplotypes in Qatari: Recommendation for Establishing Pharmacogenomic Markers Screening for Drug Hypersensitivity	10.3389/fphar.2022.891838	https://www.ncbi.nlm.nih.gov/pmc/articles/PMC9393242/	Google scholar	83	Included	Included	Not Vietnamese	Not Vietnamese	Excluded
	96	Human leukocyte antigen-associated severe cutaneous adverse drug reactions: from bedside to bench and beyond	https://doi.org/10.5415/apallergy.2019.9.e20	https://synapse.koreamed.org/articles/1130205	Google scholar	84	Included	CME article	CME article	CME article	Excluded
	97	Review on Databases and Bioinformatic Approaches on Pharmacogenomics of Adverse Drug Reactions	http://doi.org/10.2147/PGPM.S290781	https://www.tandfonline.com/doi/full/10.2147/PGPM.S290781	Google scholar	85	Included	Review	Review	Review	Excluded
	98	Incidence of Antiseizure Medication–Induced Severe Cutaneous Adverse Reactions in Malaysia	https://doi.org/10.1002/jcph.2040	https://accp1.onlinelibrary.wiley.com/doi/full/10.1002/jcph.2040?casa_token=ioWTZo1tNdQAAAAA%3A-tjqPjH30d3Ij9fY4GKrU1AmRTbXWEGimZSlfy9iKXvUIhX_TrOQRA1Xh-pd-UrUImuLPE-i6j3xQank	Google scholar	86	Included	Included	Not Vietnamese	Not Vietnamese	Excluded
	99	An Updated Review of the Molecular Mechanisms in Drug Hypersensitivity	https://doi.org/10.1155/2018/6431694	https://www.hindawi.com/journals/jir/2018/6431694/	Google scholar	87	Included	Review	Review	Review	Excluded
	100	Antiepileptic and Psychotropic Drugs	https://doi.org/10.1007/978-3-030-82743-4_29	https://link.springer.com/chapter/10.1007/978-3-030-82743-4_29	Google scholar	88	Book's chapter	Book's chapter	Book's chapter	Book's chapter	Excluded
	101	Pharmacogenomics and Cutaneous Adverse Drug Reactions	DOI: 10.1007/978-981-13-1489-6_3	https://link.springer.com/chapter/10.1007/978-981-13-1489-6_3	Google scholar	89	Book's chapter	Book's chapter	Book's chapter	Book's chapter	Excluded
	102	rs9263726 is a specific genetic marker for allopurinol-induced severe cutaneous adverse reactions in Chinese patients	https://doi.org/10.2217/pme.15.38	https://www.futuremedicine.com/doi/abs/10.2217/pme.15.38	Google scholar	90	Included	Included	Not carbamazepine	Not carbamazepine	Excluded
	103	Human leucocyte antigen–adverse drug reaction associations: from a perspective of ethnicity	https://doi.org/10.1111/iji.12304	https://onlinelibrary.wiley.com/doi/full/10.1111/iji.12304	Google scholar	91	Included	Review	Review	Review	Excluded
	104	Allopurinol-Induced Severe Cutaneous Adverse Drug Reactions: An Analysis of Spontaneous Reports in Malaysia (2000–2018)	https://doi.org/10.1007/s43441-020-00245-w	https://link.springer.com/article/10.1007/s43441-020-00245-w	Google scholar	92	Included	Included	Not carbamazepine	Not carbamazepine	Excluded
	105	Delayed Drug Hypersensitivity Reactions: Molecular Recognition, Genetic Susceptibility, and Immune Mediators	https://doi.org/10.3390/biomedicines11010177	https://www.mdpi.com/2227-9059/11/1/177	Google scholar	93	Included	Review	Review	Review	Excluded
	106	Tolerated drugs in subjects with severe cutaneous adverse reactions (SCARs) induced by anticonvulsants and review of the literature	https://doi.org/10.1186/s12948-017-0072-5	https://clinicalmolecularallergy.biomedcentral.com/articles/10.1186/s12948-017-0072-5	Google scholar	94	Case-report	Case-report	Case-report	Case-report	Excluded
	107	Mechanisms of Hypersensitivity	DOI: 10.1007/978-3-030-51740-3_3	https://link.springer.com/chapter/10.1007/978-3-030-51740-3_3	Google scholar	95	Book's chapter	Book's chapter	Book's chapter	Book's chapter	Excluded
	108	Drug hypersensitivity reactions in Asia: regional issues and challenges	10.5415/apallergy.2020.10.e8	https://journals.lww.com/apallergy/Fulltext/2020/01000/Drug_hypersensitivity_reactions_in_Asia__regional.8.aspx	Google scholar	96	Included	Review	Review	Review	Excluded
	109	CARBAMAZEPINE ALLERGY AND ITS ASSOCIATION WITH THE PRESENCE OF HLA-B*15:02 AND HLA-A*31:01 ALLELES IN TAM ANH HOSPITAL	https://doi.org/10.51298/vmj.v518i2.3458	https://tapchiyhocvietnam.vn/index.php/vmj/article/view/3458		97	Included	Included	Included	Included	Included
	110	The Immunogenetics of Cutaneous Drug Reactions	https://doi.org/10.1007/978-3-030-92616-8_17	https://link.springer.com/chapter/10.1007/978-3-030-92616-8_17	Google scholar	98	Book's chapter	Book's chapter	Book's chapter	Book's chapter	Excluded
	111	Sulphasalazine Induced Toxic Epidermal Necrolysis A Case Report	-	https://d1wqtxts1xzle7.cloudfront.net/40630505/C051109011-libre.pdf?1449230314=&response-content-disposition=inline%3B+filename%3DSulphasalazine_Induced_Toxic_Epidermal_N.pdf&Expires=1686758692&Signature=IYGmEiCLlUj2WudauTA2q0WNiHtUbqN9~MCQipSLh-vf1Wwgziy0-XpUrs0LznarNTRa~XAEtWHQvG7G~RTgz~P-I9lamxR5vGJZ4lSEDysZXAgMJDGN7FrCBNuwDApKKSsehK0wZGF7xMI~8ND3tU38WK6VPmq34oxX7ox7gpYHb3Kff5Iuo1MCXVkz20zzoXW…	Google scholar	99	Case-report	Case-report	Case-report	Case-report	Excluded
	112	Epidermal Necrolysis Spectrum from Basic Theory to Practice Essentials	https://doi.org/10.1007/978-3-030-18940-2_43	https://link.springer.com/chapter/10.1007/978-3-030-18940-2_43	Google scholar	100	Book's chapter	Book's chapter	Book's chapter	Book's chapter	Excluded
	113	Drug eruptions: Great imitators	https://doi.org/10.1016/j.clindermatol.2019.10.005	https://www.sciencedirect.com/science/article/pii/S0738081X19301816?casa_token=bVx3TmsGKnsAAAAA:NY5_bOzw8omYXxowAPn11xUCtGATEFT6sCXUYPbZAEy7B_rWxA7SB0n8o39L8hoRzZ33tgnLd9g	Google scholar	101	Included	Review	Review	Review	Excluded
	114	Pharmacogenomics in Asia: a systematic review on current trends and novel discoveries	https://doi.org/10.2217/pgs-2017-0009	https://www.futuremedicine.com/doi/abs/10.2217/pgs-2017-0009	Google scholar	102	Included	Systematic review	Systematic review	Systematic review	Excluded
	115	Pharmacogenomics: A New Approach for Preventing Severe Cutaneous Adverse Drug Reactions	10.1007/978-981-10-7506-3_18	https://link.springer.com/chapter/10.1007/978-981-10-7506-3_18	Google scholar	103	Book's chapter	Book's chapter	Book's chapter	Book's chapter	Excluded
	116	Genetic Variants Associated With Drug-Induced Hypersensitivity Reactions: towards Precision Medicine?	https://doi.org/10.1007/s40521-020-00278-4	https://link.springer.com/article/10.1007/s40521-020-00278-4	Google scholar	104	Included	Review	Review	Review	Excluded
	117	Tolerated drugs in subjects with severe cutaneous adverse reactions (SCARs) induced by anticonvulsants and review of the literature	https://dx.doi.org/10.1186/s12948-017-0072-5	https://air.unimi.it/handle/2434/540635	Google scholar	105	Duplication	Duplication	Duplication	Duplication	Excluded
	118	An Update on the Immunological, Metabolic and Genetic Mechanisms in Drug Hypersensitivity Reactions	https://doi.org/10.2174/1381612825666191105122414	https://www.ingentaconnect.com/content/ben/cpd/2019/00000025/00000036/art00003	Google scholar	106	Included	Review	Review	Review	Excluded
	119	Immunological Disorders	10.1007/978-981-16-1037-0_32	https://link.springer.com/chapter/10.1007/978-981-16-1037-0_32	Google scholar	107	Book's chapter	Book's chapter	Book's chapter	Book's chapter	Excluded
	120	Genetic Predictors of Drug Hypersensitivity	-	https://www.ingentaconnect.com/content/ben/cpd/2016/00000022/00000045/art00002	Google scholar	108	Book's chapter	Book's chapter	Book's chapter	Book's chapter	Excluded
	121	THE GENETICS OF DRUG HYPERSENSITIVITY REACTIONS	doi: 10.18176/jiaci.0078	http://www.esmonformacion.com/jiaci/revistas/doi10.18176_jiaci.0078.pdf	Google scholar	109	Included	Review	Review	Review	Excluded
	122	CYP2D6 expression in the whole blood of epileptic patients in treatment with Carbamazepine	https://doi.org/10.31276/VJST.64(12).10-14	https://b.vjst.vn/index.php/ban_b/article/view/1920	Google scholar	110	Included	Included	Not relevant	Not relevant	Excluded
	123	Genophenotypic Factors and Pharmacogenomics in Adverse Drug Reactions	https://doi.org/10.3390/ijms222413302		Google scholar	111	Included	Review	Review	Review	Excluded
	124	Informatics investigations into HLA-mediated adverse drug reactions	-	https://www.proquest.com/openview/b3a87f24b89586e40f3d4fc889ebdba4/1?pq-origsite=gscholar&cbl=44156	Google scholar	112	Included	Included	Not relevant	Not relevant	Excluded
	125	How Can Drug Metabolism and Transporter Genetics Inform Psychotropic Prescribing?	https://doi.org/10.3389/fgene.2020.491895	https://www.frontiersin.org/articles/10.3389/fgene.2020.491895/full	Google scholar	113	Included	Review	Review	Review	Excluded
	126	Developing pharmacogenetic screening methods for an emergent country: Vietnam	https://doi.org/10.1016/j.waojou.2019.100037	https://www.sciencedirect.com/science/article/pii/S1939455119306660	ScienceDirect	1	Duplication	Duplication	Duplication	Duplication	Excluded
	127	Role of human leukocyte antigen in anti-epileptic drugs-induced Stevens–Johnson Syndrome/toxic epidermal necrolysis: A meta-analysis	https://doi.org/10.1016/j.seizure.2022.09.011	https://www.sciencedirect.com/science/article/abs/pii/S1059131122002035	ScienceDirect	2	Duplication	Duplication	Duplication	Duplication	Excluded
	128	Recent advances in the genetics and immunology of Stevens-Johnson syndrome and toxic epidermal necrosis	https://doi.org/10.1016/j.jdermsci.2012.04.002	https://www.sciencedirect.com/science/article/abs/pii/S092318111200134X	ScienceDirect	3	Included	Review	Review	Review	Excluded
	129	Severe cutaneous adverse reaction associated with antiseizure medications: Diagnosis, management, and prevention	https://doi.org/10.1016/j.yebeh.2021.107844	https://www.sciencedirect.com/science/article/abs/pii/S1525505021000780	ScienceDirect	4	Included	Review	Review	Review	Excluded
	130	Rashes and other hypersensitivity reactions associated with antiepileptic drugs: A review of current literature	https://doi.org/10.1016/j.seizure.2019.07.015	https://www.sciencedirect.com/science/article/pii/S1059131119301888	ScienceDirect	5	Included	Review	Review	Review	Excluded
	131	Management of Persons Infected with Human Immunodeficiency Virus Requiring Admission to the Intensive Care Unit	https://doi.org/10.1016/j.ccc.2013.03.010	https://www.sciencedirect.com/science/article/abs/pii/S0749070413000274	ScienceDirect	6	Included	Review	Review	Review	Excluded
	132	Significant HLA class I type associations with aromatic antiepileptic drug (AED)-induced SJS/TEN are different from those found for the same AED-induced DRESS in the Spanish population	https://doi.org/10.1016/j.phrs.2016.11.027	https://www.sciencedirect.com/science/article/abs/pii/S1043661816305904	ScienceDirect	7	Included	Included	Not Vietnamese	Not Vietnamese	Excluded
	133	Next-generation sequencing-based HLA typing reveals the association of HLA-B*46:01:01 and HLA-DRB1*09:01:02 alleles with carbamazepine-induced hypersensitivity reactions in Vietnamese patients with epilepsy	https://doi.org/10.1016/j.humimm.2023.01.005	https://www.sciencedirect.com/science/article/abs/pii/S0198885923000058	ScienceDirect	8	Duplication	Duplication	Duplication	Duplication	Excluded
	134	Validation of a novel real-time PCR assay for detection of HLA-B*15:02 allele for prevention of carbamazepine – Induced Stevens-Johnson syndrome/Toxic Epidermal Necrolysis in individuals of Asian ancestry	https://doi.org/10.1016/j.humimm.2016.08.010	https://www.sciencedirect.com/science/article/abs/pii/S0198885916304190	ScienceDirect	9	Duplication	Duplication	Duplication	Duplication	Excluded
	135	Severe cutaneous adverse reactions in Asians: Trends observed in culprit anti-seizure medicines using VigiBase®	https://doi.org/10.1016/j.seizure.2021.07.011	https://www.sciencedirect.com/science/article/pii/S1059131121002430	ScienceDirect	10	Included	Included	Data unspecified	Data unspecified	Excluded
	136	Drug-induced severe cutaneous adverse reactions: Determine the cause and prevention	https://doi.org/10.1016/j.anai.2019.08.004	https://www.sciencedirect.com/science/article/abs/pii/S1081120619305800	ScienceDirect	11	Included	Review	Review	Review	Excluded
	137	Pharmacogenetics of hypersensitivity drug reactions	https://doi.org/10.1016/j.therap.2016.12.009	https://www.sciencedirect.com/science/article/abs/pii/S0040595716312859	ScienceDirect	12	Included	Review	Review	Review	Excluded
	138	Management of genetic epilepsies: From empirical treatment to precision medicine	https://doi.org/10.1016/j.phrs.2016.04.006	https://www.sciencedirect.com/science/article/abs/pii/S1043661816302961	ScienceDirect	13	Included	Perspective	Perspective	Perspective	Excluded
	139	Chapter 21 - HLA and the Pharmacogenomics of Drug Hypersensitivity	https://doi.org/10.1016/B978-0-12-386882-4.00021-9	https://www.sciencedirect.com/science/article/abs/pii/B9780123868824000219	ScienceDirect	14	Book's chapter	Book's chapter	Book's chapter	Book's chapter	Excluded
	140	Chapter 2 - Immunogenetics in the diagnosis of clinical disorders	https://doi.org/10.1016/B978-0-323-90250-2.00012-1	https://www.sciencedirect.com/science/article/abs/pii/B9780323902502000121	ScienceDirect	15	Book's chapter	Book's chapter	Book's chapter	Book's chapter	Excluded
	141	Chapter 2 - Governmental and Academic Efforts to Advance the Field of Pharmacogenomics	https://doi.org/10.1016/B978-0-12-812626-4.00002-4	https://www.sciencedirect.com/science/article/abs/pii/B9780128126264000024	ScienceDirect	16	Book's chapter	Book's chapter	Book's chapter	Book's chapter	Excluded
	142	Réaction cutanée sévère associées aux antigènes leucocytes humains chez les Vietnamiens	https://doi.org/10.1016/j.reval.2019.02.110	https://www.sciencedirect.com/science/article/abs/pii/S1877032019301307	ScienceDirect	17	Included	Included	Data unspecified	Data unspecified	Excluded
	143	Genetic Susceptibility to Carbamazepine and Allopurinol–Induced Severe Cutaneous Adverse Reactions in Vietnamese	https://doi.org/10.1016/j.jaci.2016.12.378	https://www.sciencedirect.com/science/article/abs/pii/S0091674916318966	ScienceDirect	18	Duplication	Duplication	Duplication	Duplication	Excluded
	144	Poster Presentations: Posters Friday, 12 April 2019	https://doi.org/10.1016/S0168-8278(19)30204-1	https://www.sciencedirect.com/science/article/abs/pii/S0168827819302041	ScienceDirect	19	Included	Included	Not relevant	Not relevant	Excluded
	145	Abstracts of the XX World Allergy CongressTM 2007 December 2–6, 2007, Bangkok, Thailand	https://doi.org/10.1186/1939-4551-1-S3-A1	https://www.sciencedirect.com/science/article/pii/S1939455119306829	ScienceDirect	20	Included	Included	Not relevant	Not relevant	Excluded
	146	The 9th International Child Neurology Congress The 7th Asian and Oceanian Congress of Child Neurology: September 20–25, 2002 Beijing, China	https://doi.org/10.1016/S0387-7604(02)00091-8	https://www.sciencedirect.com/science/article/abs/pii/S0387760402000918	ScienceDirect	21	Included	Included	Data unspecified	Data unspecified	Excluded
	147	A study of HLA-B∗15:02 in a Sri Lankan population: Implications for pharmacogenomic testing	https://doi.org/10.1016/j.humimm.2016.04.001	https://www.sciencedirect.com/science/article/abs/pii/S0198885916300416	ScienceDirect	22	Included	Included	Not Vietnamese	Not Vietnamese	Excluded
	148	Scientific Abstract Sessions	https://doi.org/10.1016/S0091-6749(22)02582-9	https://www.sciencedirect.com/science/article/pii/S0091674922025829	ScienceDirect	23	Included	Included	Not relevant	Not relevant	Excluded
	149	Saturday, March 17	https://doi.org/10.1016/S0091-6749(01)56696-8	https://www.sciencedirect.com/science/article/abs/pii/S0091674901566968	ScienceDirect	24	Included	Included	Not relevant	Not relevant	Excluded
	150	Abstract Book	https://doi.org/10.1016/j.anai.2012.09.018	https://www.sciencedirect.com/science/article/abs/pii/S1081120612007442	ScienceDirect	25	Included	Included	Not relevant	Not relevant	Excluded
